# Supplementary material for: Helical polymer/Fe3O4 NPs constructing optically active, magnetic core/shell microspheres: preparation by emulsion polymerization and recycling application in enantioselective crystallization
Source: Royal Society of Chemistry journal article supplement (doi:10.1039/c5py01549a), 2015-10-14
Supplement: c5py01549a1.pdf [file c5py01549a1.pdf]

*Supporting Information*

**Helical Polymer/ $\text{Fe}_3\text{O}_4$  NPs Constructing Optically Active, Magnetic  
Core/Shell Microspheres: Preparation by Emulsion Polymerization  
and Recycling Application in Enantioselective Crystallization**

Huaiyu Chen, Jinyong Zhou and Jianping Deng\*

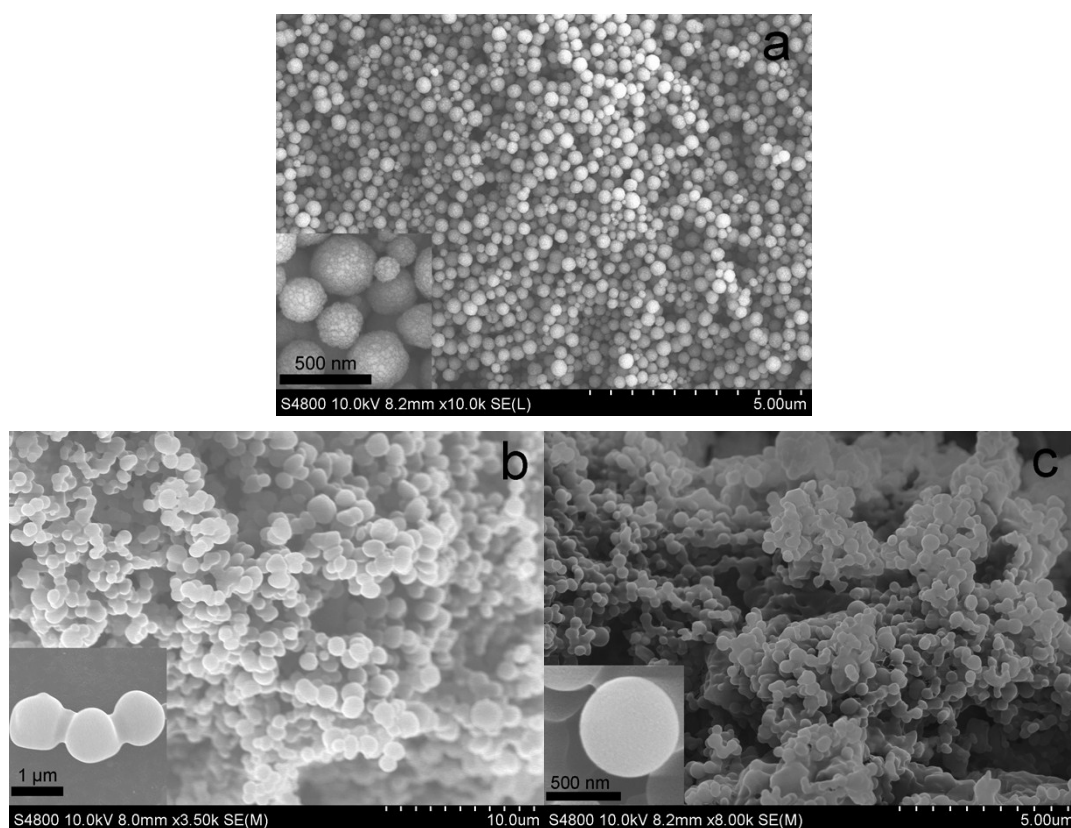

**Figure S1.** Typical SEM images of (a)  $\text{Fe}_3\text{O}_4$  NPs, (b) optically active, magnetic  $\text{Fe}_3\text{O}_4$ @PA core/shell composite MPs and (c) pure substituted polyacetylene NPs (inset, enlarged microspheres).

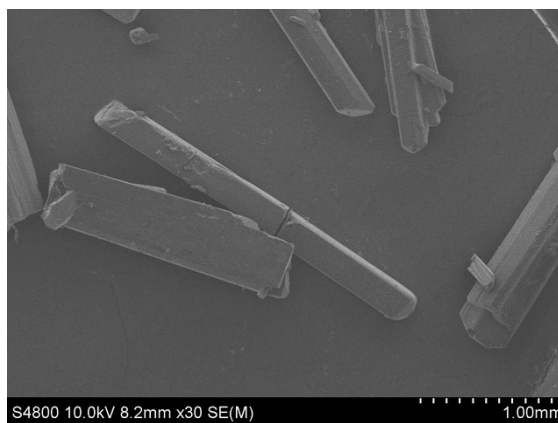

**Figure S2.** SEM image of the L-threonine crystals induced by  $\text{Fe}_3\text{O}_4@\text{PA}$  MPs in the second crystallization cycle.
